# Supplementary material for: Does Hemoperfusion Increase Survival in Acute Paraquat Poisoning? A Retrospective Multicenter Study
Source: PubMed Central journal article supplement (PMC7711471; doi:10.3390/toxics8040084), 2020-10-10
Supplement: toxics-08-00084-s001.pdf [file toxics-08-00084-s001.pdf]

# Supplementary Materials: Does Hemoperfusion Increase Survival in Acute Paraquat Poisoning? A Retrospective Multicenter Study

Ying-Tse Yeh, Chun-Kuei Chen, Chih-Chuan Lin, Chia-Ming Chang, Kai-Ping Lan, Chorng-Kuang How, Hung-Tsang Yen, and Yen-Chia Chen

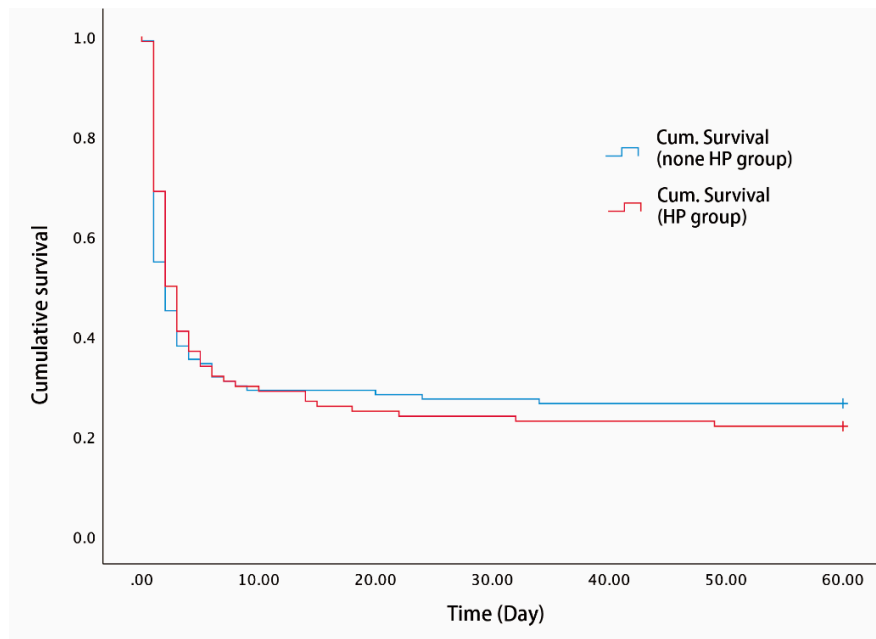

**Figure S1.** Kaplan–Meier survival analysis between the hemoperfusion (HP) group and non-HP group ( $p = 0.943$ , log-rank test).
